# Supplementary material
Source: PubMed Central journal article supplement (PMC4147621)
Supplement: amiajnl-2013-001934-s1.pdf [file amiajnl-2013-001934-s1.pdf]

**Supplementary Table S1. Summary of performance measures for Topaz and MedLEE for findings with  $LR^+ \geq 3$  or  $LR^- \leq 0.33$**

| NLP systems | Measures                      | Lab confirmed flu | Chill           | Fever             | Suspected Flu   | Sore throat     | Hoarseness    | Cervical Lymphadenopathy | Rhinorrhea      | Influenza like illness (ILI) | Wheezing        | Cough             | Arthralgia     | Viral Infection | Lab Order (nasal swab) | Viral Syndrome  | Myalgia         | Malaise         |
|-------------|-------------------------------|-------------------|-----------------|-------------------|-----------------|-----------------|---------------|--------------------------|-----------------|------------------------------|-----------------|-------------------|----------------|-----------------|------------------------|-----------------|-----------------|-----------------|
| MedLEE      | Accuracy                      | 0.99              | 0.96            | 0.83              | 0.9             | 0.72            | 0.99          | 0.64                     | 0.87            | 0.99                         | 0.95            | 0.93              | 0.96           | 0.83            | 0.92                   | 0.96            | 0.9             | 1               |
|             | Accuracy (absent and present) | 0                 | 0.94            | 0.83              | 0.67            | 0.46            | 0.75          | 0.08                     | 0.51            | 0                            | 0.88            | 0.91              | 0.72           | 0.57            | 0.72                   | 0.8             | 0.64            | 1               |
|             | Recall present                | 0<br>(0/1)        | 0.92<br>(45/49) | 0.86<br>(103/120) | 0.67<br>(30/45) | 0.82<br>(28/34) | 1<br>(1/1)    | 0.14<br>(1/7)            | 0.6<br>(21/35)  | 0<br>(0/3)                   | 0.74<br>(25/34) | 0.89<br>(91/102)  | 0.69<br>(9/13) | 0.61<br>(25/41) | 0.72<br>(33/46)        | 0.84<br>(32/38) | 0.61<br>(31/51) | 1<br>(14/14)    |
|             | Recall absent                 | .<br>(0/0)        | 0.97<br>(33/34) | 0.78<br>(54/69)   | 1<br>(1/1)      | 0.31<br>(24/78) | 0.67<br>(2/3) | 0.08<br>(6/76)           | 0.33<br>(6/18)  | .<br>(0/0)                   | 0.97<br>(59/61) | 0.96<br>(27/28)   | 0.75<br>(6/8)  | 0<br>(0/3)      | .<br>(0/0)             | 0<br>(0/2)      | 1<br>(4/4)      | 1<br>(2/2)      |
|             | Precision present             | .<br>(0/0)        | 0.96<br>(45/47) | 0.93<br>(103/111) | 0.86<br>(30/35) | 0.97<br>(28/29) | 1<br>(1/1)    | 1<br>(1/1)               | 0.91<br>(21/23) | .<br>(0/0)                   | 0.96<br>(25/26) | 0.97<br>(91/94)   | 1<br>(9/9)     | 0.6<br>(25/42)  | 0.89<br>(33/37)        | 1<br>(32/32)    | 0.97<br>(31/32) | 1<br>(14/14)    |
|             | Precision absent              | 0<br>(0/1)        | 0.89<br>(33/37) | 0.84<br>(54/64)   | 0.25<br>(1/4)   | 0.92<br>(24/26) | 0.67<br>(2/3) | 1<br>(6/6)               | 0.67<br>(6/9)   | .<br>(0/0)                   | 0.97<br>(59/61) | 0.96<br>(27/28)   | 0.75<br>(6/8)  | .<br>(0/0)      | 0<br>(0/1)             | 0<br>(0/1)      | 0.67<br>(4/6)   | 1<br>(2/2)      |
| TOPAZ       | Accuracy                      | 0.99              | 0.94            | 0.91              | 0.78            | 0.74            | 0.99          | 0.94                     | 0.95            | 1                            | 0.99            | 0.99              | 0.96           | 0.84            | 0.81                   | 0.96            | 0.89            | 0.89            |
|             | Accuracy (absent and present) | 1                 | 0.91            | 0.91              | 0               | 0.52            | 0.75          | 0.95                     | 0.85            | 0.67                         | 0.98            | 1                 | 0.67           | 0.25            | 0.11                   | 0.83            | 0.6             | 1               |
|             | Recall present                | 1<br>(1/1)        | 0.92<br>(45/49) | 0.91<br>(109/120) | 0<br>(0/45)     | 0.85<br>(29/34) | 1<br>(1/1)    | 0.71<br>(5/7)            | 0.86<br>(30/35) | 0.67<br>(2/3)                | 0.94<br>(32/34) | 1<br>(102/102)    | 0.69<br>(9/13) | 0.27<br>(11/41) | 0.11<br>(5/46)         | 0.87<br>(33/38) | 0.59<br>(30/51) | 1<br>(14/14)    |
|             | Recall absent                 | .<br>(0/0)        | 0.88<br>(30/34) | 0.91<br>(63/69)   | 0<br>(0/1)      | 0.37<br>(29/78) | 0.67<br>(2/3) | 0.97<br>(74/76)          | 0.83<br>(15/18) | .<br>(0/0)                   | 1<br>(61/61)    | 1<br>(28/28)      | 0.63<br>(5/8)  | 0<br>(0/3)      | .<br>(0/0)             | 0<br>(0/2)      | 0.75<br>(3/4)   | 1<br>(2/2)      |
|             | Precision present             | 0.33<br>(1/3)     | 0.92<br>(45/49) | 0.93<br>(109/117) | .<br>(0/0)      | 0.94<br>(29/31) | 0.5<br>(1/2)  | 1<br>(5/5)               | 1<br>(30/30)    | 1<br>(2/2)                   | 1<br>(32/32)    | 0.97<br>(102/105) | 1<br>(9/9)     | 1<br>(11/11)    | 1<br>(5/5)             | 0.97<br>(33/34) | 0.97<br>(30/31) | 0.45<br>(14/31) |
|             | Precision absent              | .<br>(0/0)        | 0.88<br>(30/34) | 0.86<br>(63/73)   | .<br>(0/0)      | 1<br>(29/29)    | 0.67<br>(2/3) | 0.9<br>(74/82)           | 0.75<br>(15/20) | .<br>(0/0)                   | 0.98<br>(61/62) | 1<br>(28/28)      | 0.63<br>(5/8)  | .<br>(0/0)      | .<br>(0/0)             | .<br>(0/0)      | 0.75<br>(3/4)   | 0.25<br>(2/8)   |
